# Supplementary material for: Role of mitochondria-endoplasmic reticulum coupling in lycopene preventing DEHP-induced hepatotoxicity
Source: Royal Society of Chemistry journal article supplement (doi:10.1039/d1fo00478f), 2021-01-01

**Supplementary information**  
**of the full unprocessed and uncropped images of Western Blots**

**1. OPA1**

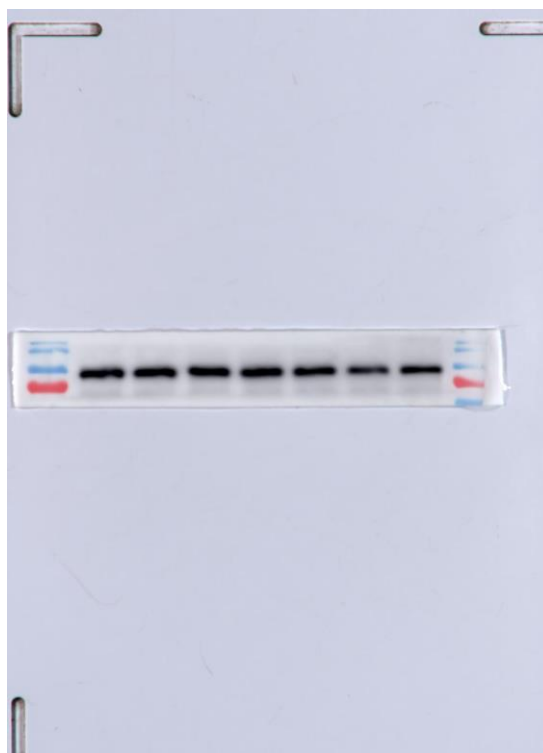

## 2. Mfn1

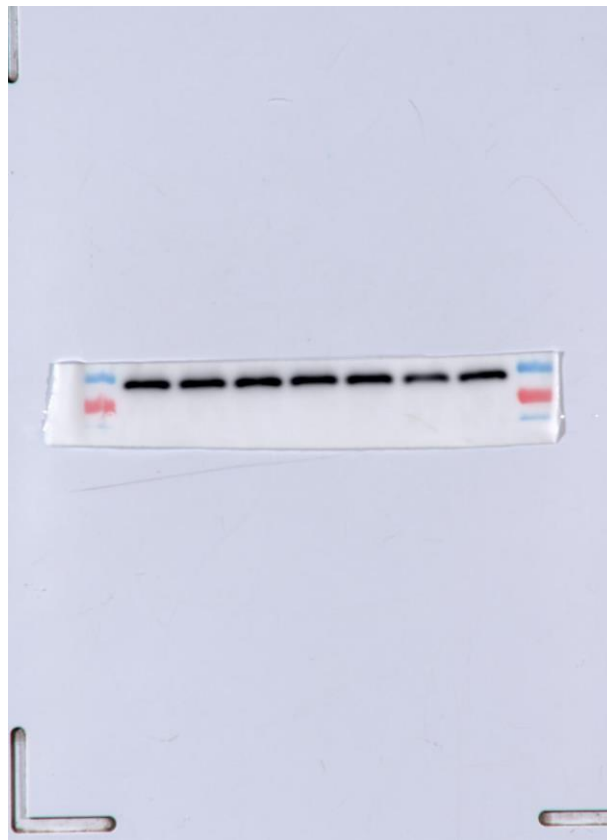

### 3. GRP75

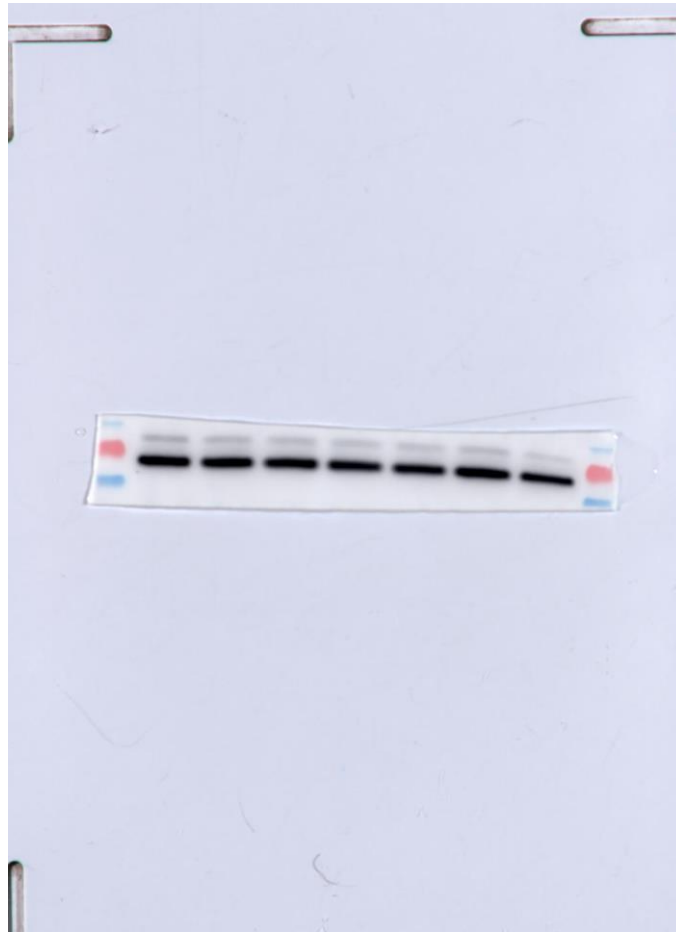

#### 4. $\beta$ -actin

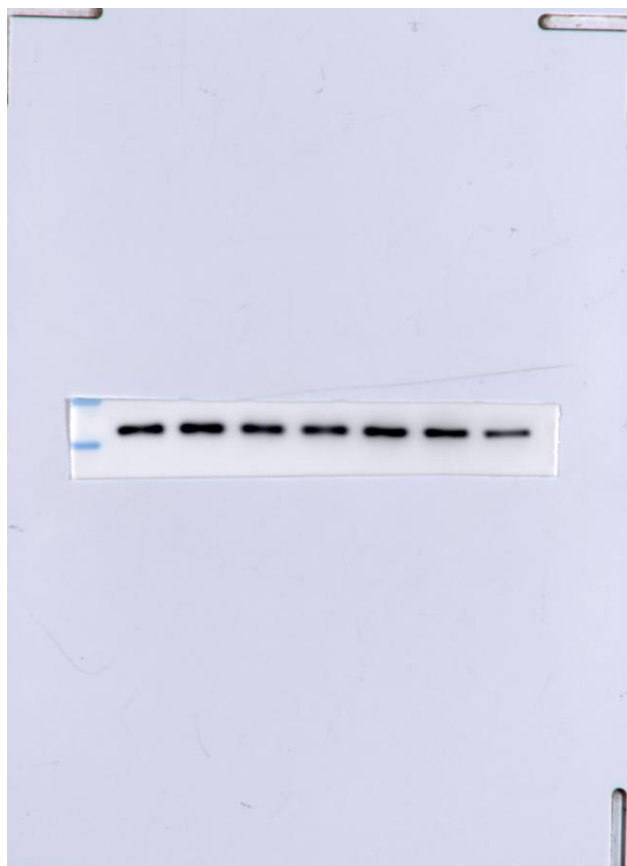

## 5. Mfn2

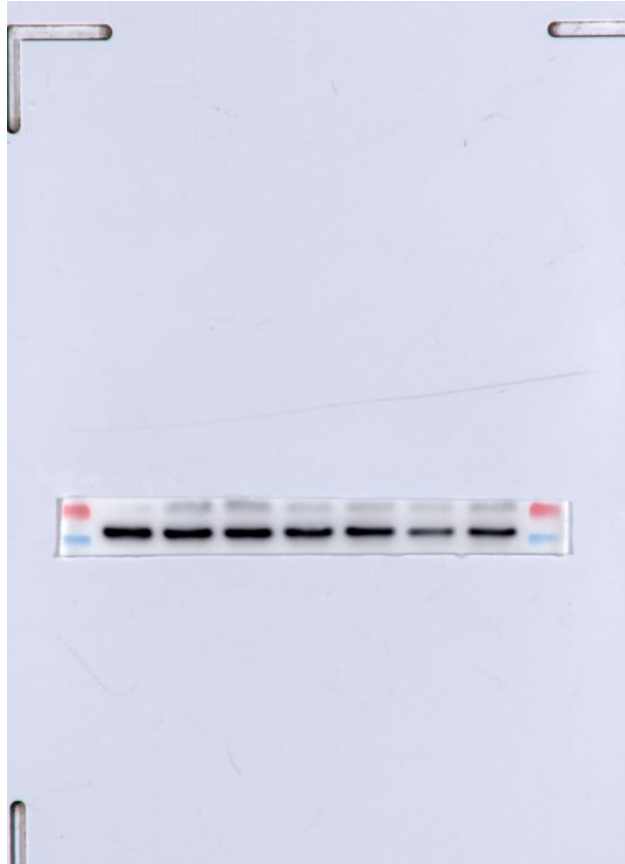

## 6. Drp1

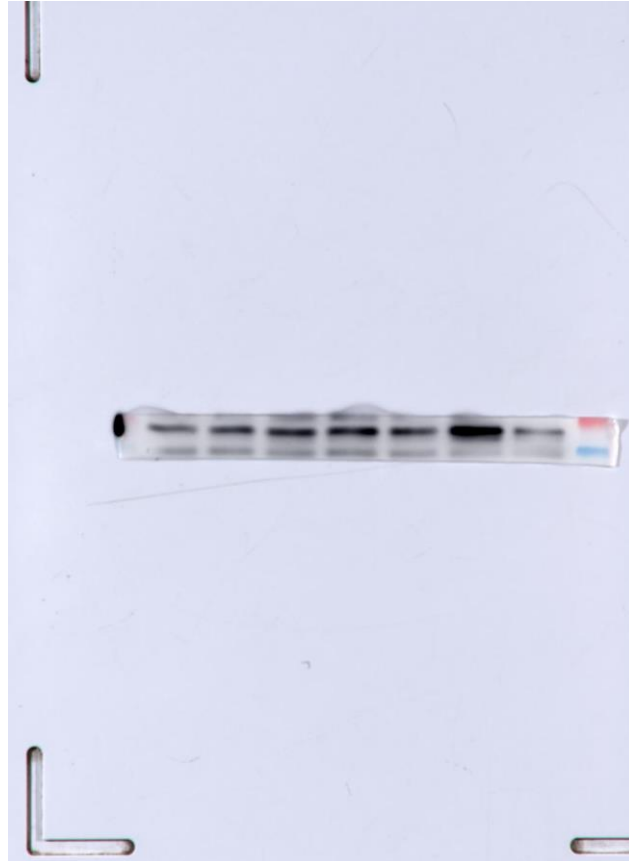

## 7. VDAC1

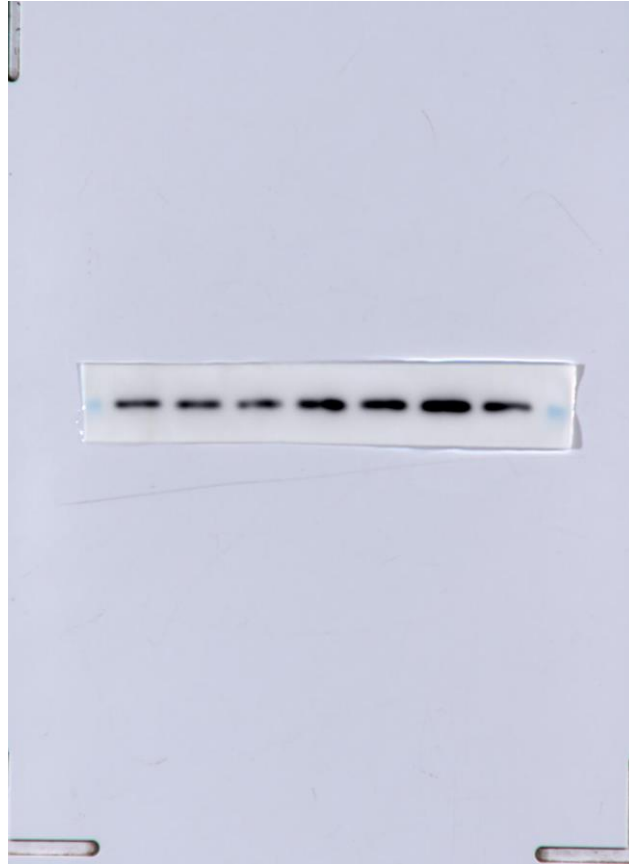

## 8. GRP78

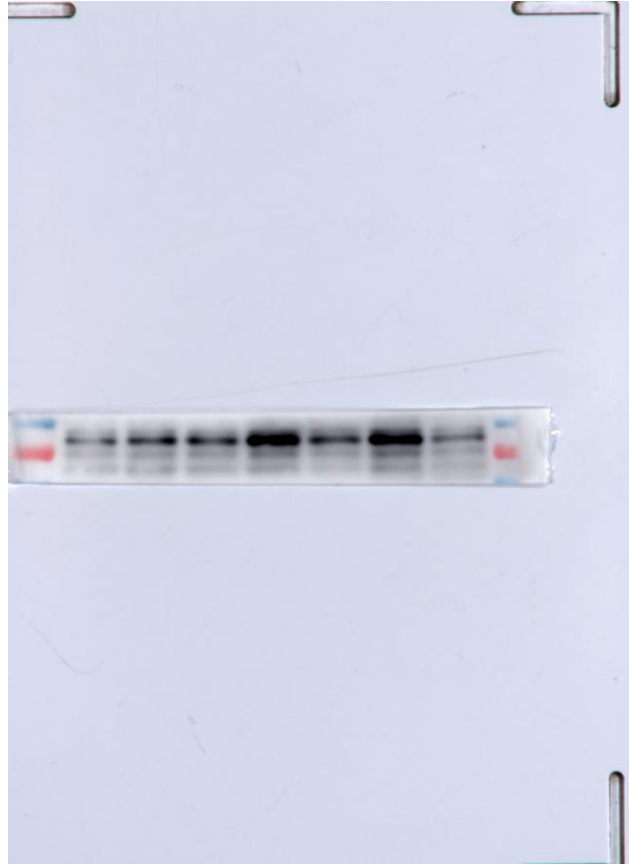



## 9. ATF6

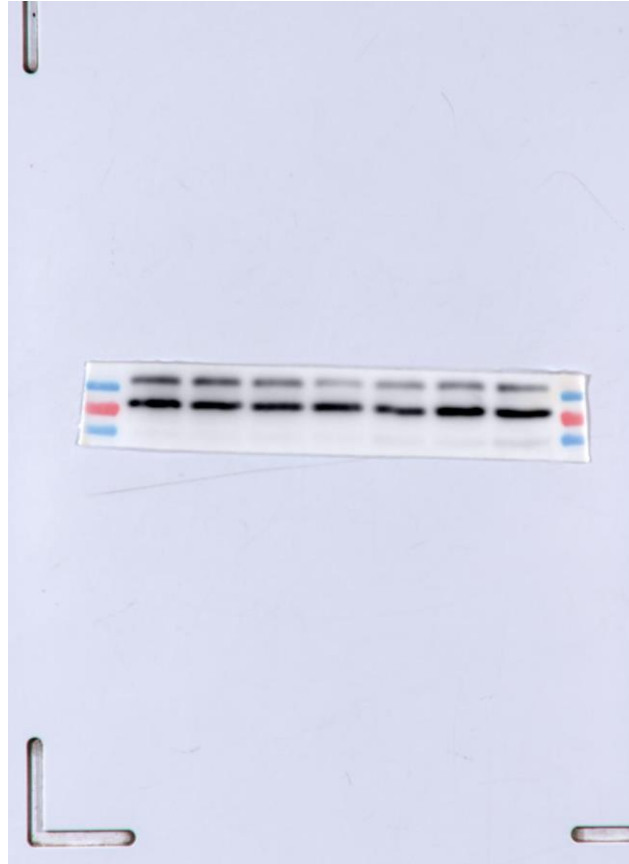

## 10. XBP-1

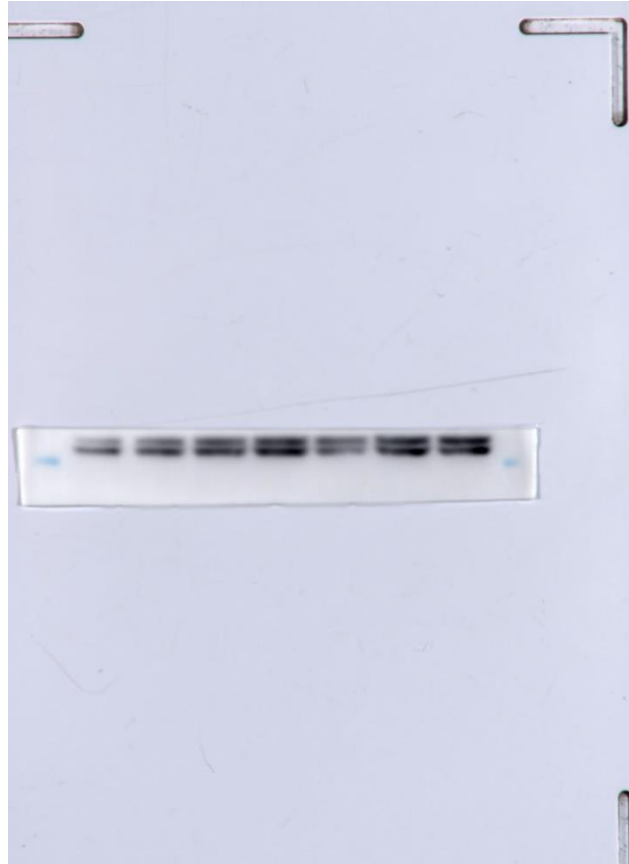

## 11. ATF4

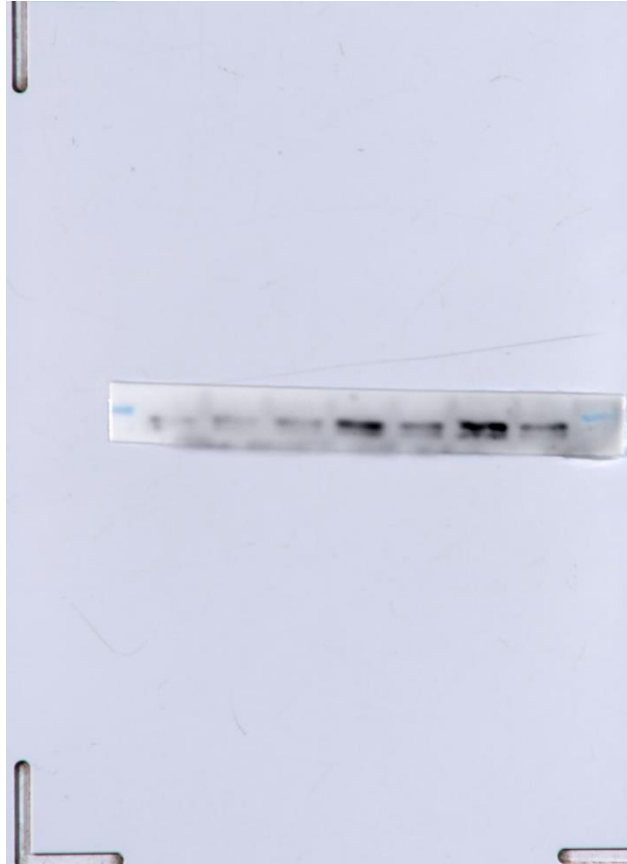

## 12. $\beta$ -actin

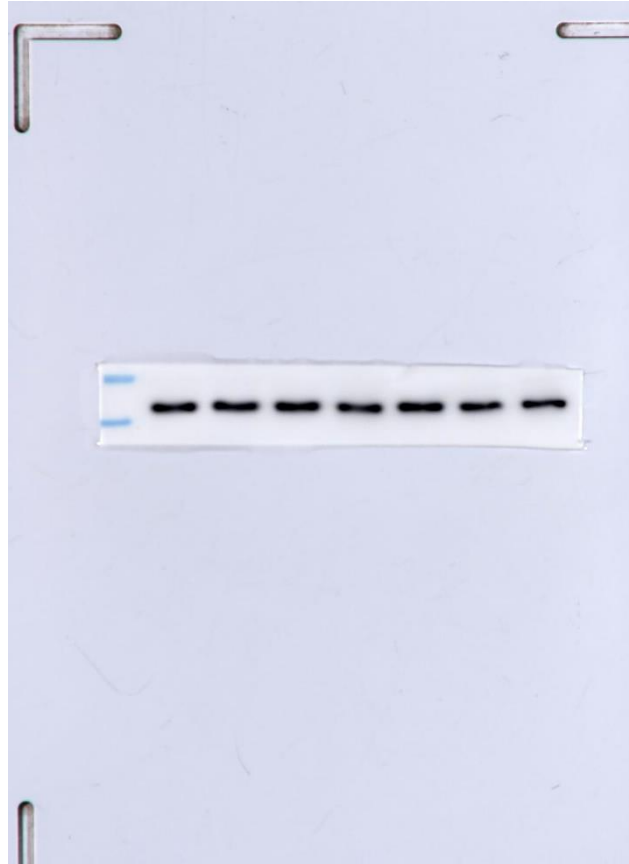

Supplement: d1fo00478f1.pdf [file d1fo00478f1.pdf]
